# Supplementary material
Source: publisher site journal article supplement (https://www.dovepress.com/article/223000)
Supplement: Supplementary file 1 [file get_supplementary_file.php]

## Supplement materials

**Table S1: Patients not receiving FCP before the diagnosis: Cumulated incidence proportion of FCP 6 months to 5 years after incident hospital diagnoses of stroke, Parkinsons Disease (PD), Multiple Sclerosis (MS) and Rheumatoid Arthritis (RA) between 2007 and 2016**

| Time since<br>incident hospital<br>diagnosis | Stroke  |                    | PD   |                    | MS   |                    | RA     |                    |
|----------------------------------------------|---------|--------------------|------|--------------------|------|--------------------|--------|--------------------|
|                                              | n*      | CIP, %<br>(95% CI) | n*   | CIP, %<br>(95% CI) | n*   | CIP, %<br>(95% CI) | n*     | CIP, %<br>(95% CI) |
| <b>6 months</b>                              | 113,653 | 2.3 (2.3–2.4)      | 3588 | 16.2 (15.1–17.3)   | 3801 | 20.6 (19.4–21.7)   | 13,334 | 3.6 (3.3–3.9)      |
| <b>1 year</b>                                | 100,808 | 4.9 (4.8–5.1)      | 2856 | 27.3 (26.0–28.6)   | 3134 | 31.7 (30.4–33.0)   | 12,431 | 6.3 (5.0–6.9)      |
| <b>2 years</b>                               | 81,797  | 7.2 (7.0–7.3)      | 1944 | 38.9 (37.5–40.3)   | 2401 | 41.8 (40.4–43.2)   | 10,546 | 10.4 (9.9–10.9)    |
| <b>3 years</b>                               | 66,591  | 8.3 (8.1–8.4)      | 1385 | 44.8 (43.3–46.2)   | 1943 | 47.4 (45.9–48.9)   | 8,848  | 13.5 (12.0–14.1)   |
| <b>4 years</b>                               | 53,593  | 9.0 (8.8–9.2)      | 986  | 48.6 (47.0–50.0)   | 1530 | 51.8 (50.3–53.2)   | 7,310  | 15.8 (15.1–16.4)   |
| <b>5 years</b>                               | 41,981  | 9.6 (9.5–9.8)      | 664  | 52.2 (50.6–53.7)   | 1211 | 55.0 (53.4–56.5)   | 5,946  | 17.5 (16.8–18.2)   |

**Abbreviations:** FCP, Free of charge physiotherapy; CIP, cumulated incidence proportion; CI, confidence interval

n\*, Number at risk

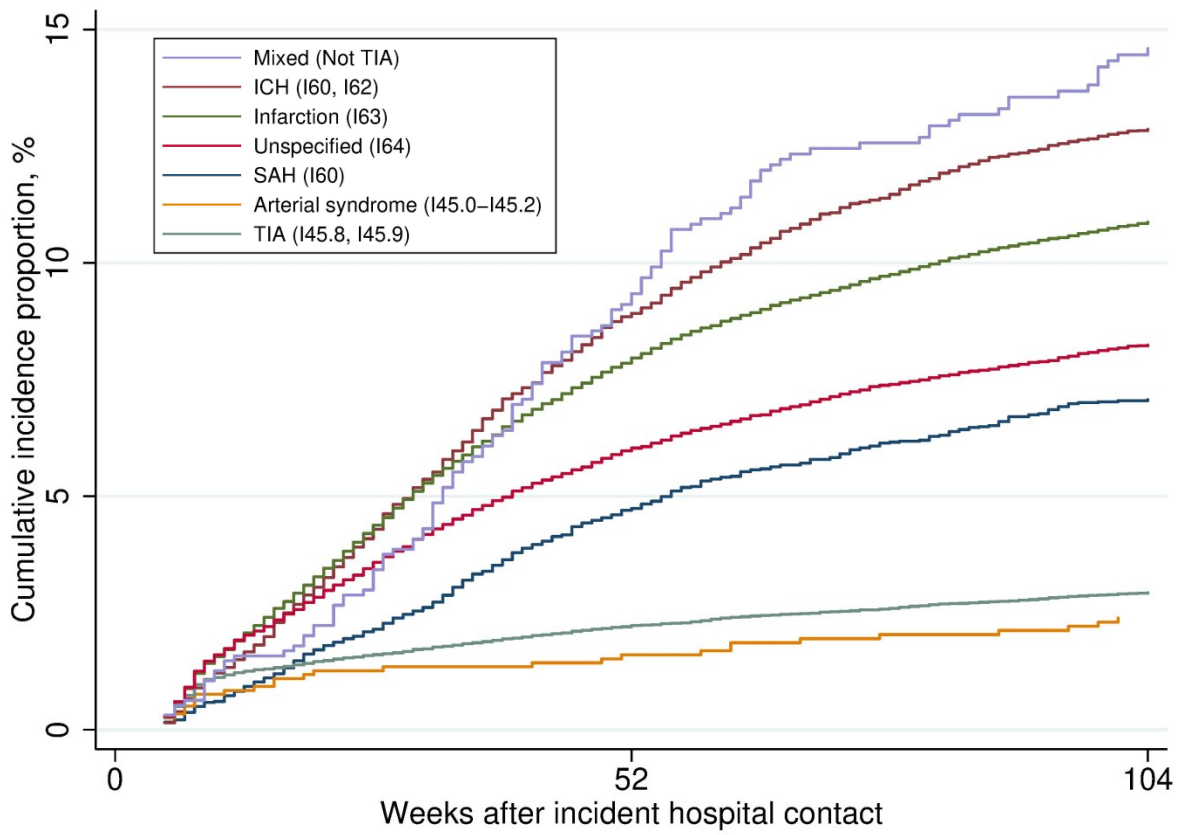

**Figure S1:** Cumulative incidence proportion of FCP in sub-diagnoses of stroke. Numbers in the legend refer to the ICD-10 codes.

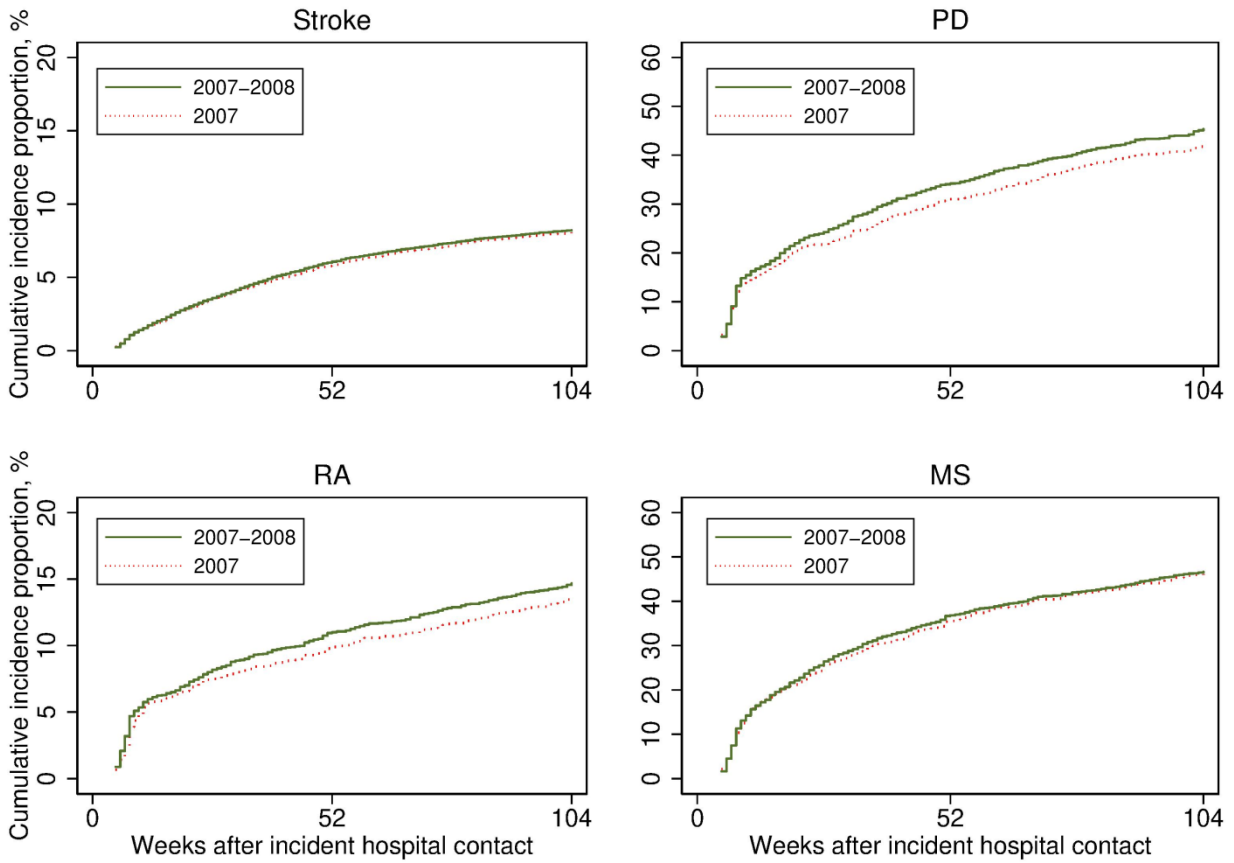

**Figure S2:** Cumulative incidence proportion of FCP after incident hospital diagnoses of stroke, Parkinsons Disease (PD), Multiple Sclerosis (MS) and Rheumatoid Arthritis (RA) in 2007 and 2007-2008 combined.
